# Supplementary material for: Fe1−xS/nitrogen and sulfur Co-doped carbon composite derived from a nanosized metal–organic framework for high-performance lithium-ion batteries
Source: Royal Society of Chemistry journal article supplement (doi:10.1039/c8qi00910d), 2018-10-05
Supplement: c8qi00910d1.pdf [file c8qi00910d1.pdf]

# Supporting Information

## **Fe<sub>1-x</sub>S/Nitrogen and Sulfur Co-doped Carbon Composite Derived from Nanosized Metal-Organic Framework for High-Performance Lithium-Ion Batteries**

Yingying Liu,<sup>a</sup> Ming Zhong,<sup>a</sup> Lingjun Kong,<sup>a</sup> Ang Li,<sup>a</sup> Xiaowen Sun,<sup>a</sup> Danhong Wang,<sup>a</sup> Xian-He Bu<sup>\*a,b,c</sup>

<sup>a</sup>School of Materials Science and Engineering, National Institute for Advanced Materials, TKL of Metal and Molecule Based Material Chemistry, Nankai University, Tianjin 300350, P.R. China.

<sup>b</sup>Key Laboratory of Advanced Energy Materials Chemistry (Ministry of Education), College of Chemistry, Nankai University, Tianjin 300071, P. R. China

<sup>c</sup>Collaborative Innovation Center of Chemical Science and Engineering, Tianjin 300072, P.R. China

---

\*Corresponding author. E-mail: [buxh@nankai.edu.cn](mailto:buxh@nankai.edu.cn) (X.-H. Bu).

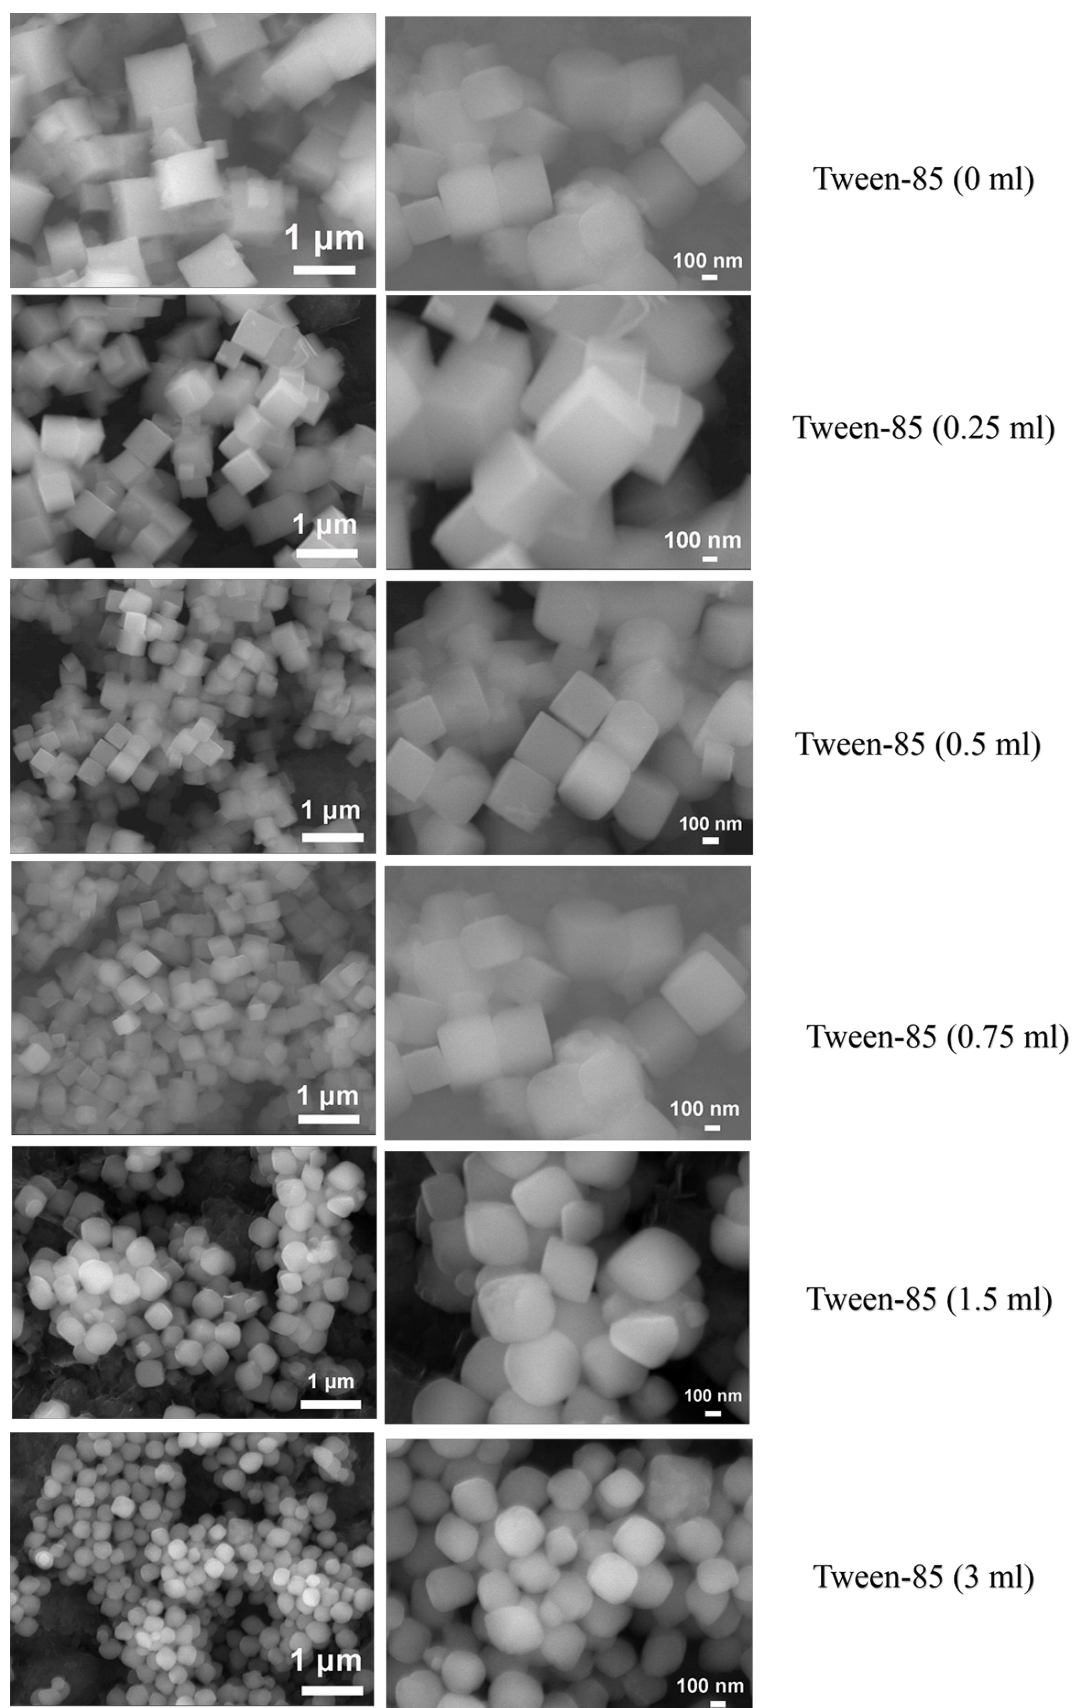

**Fig. S1** The morphologies of Fe-MOF with adding different amounts of Tween-85.

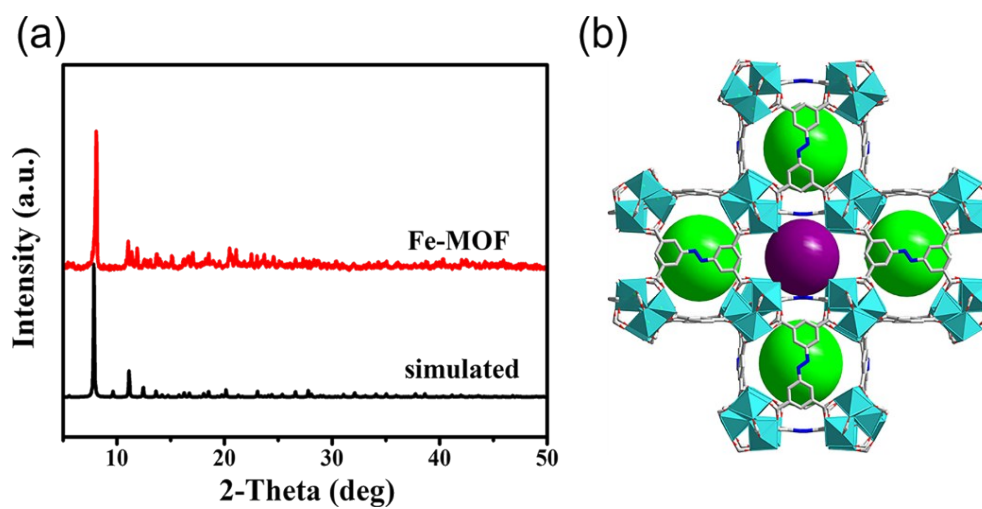

**Fig. S2** (a)XRD pattern and (b) crystal structure of Fe-MOF.

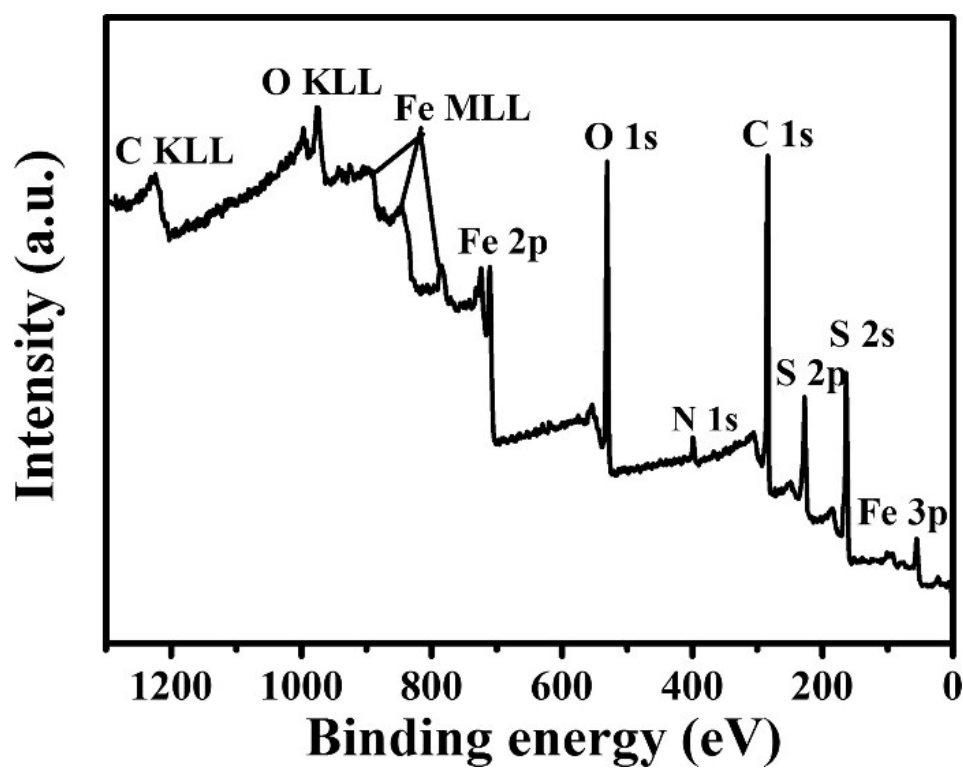

**Fig. S3** The XPS survey spectrum of  $\text{Fe}_{1-x}\text{S}/\text{NSC}$  composite.

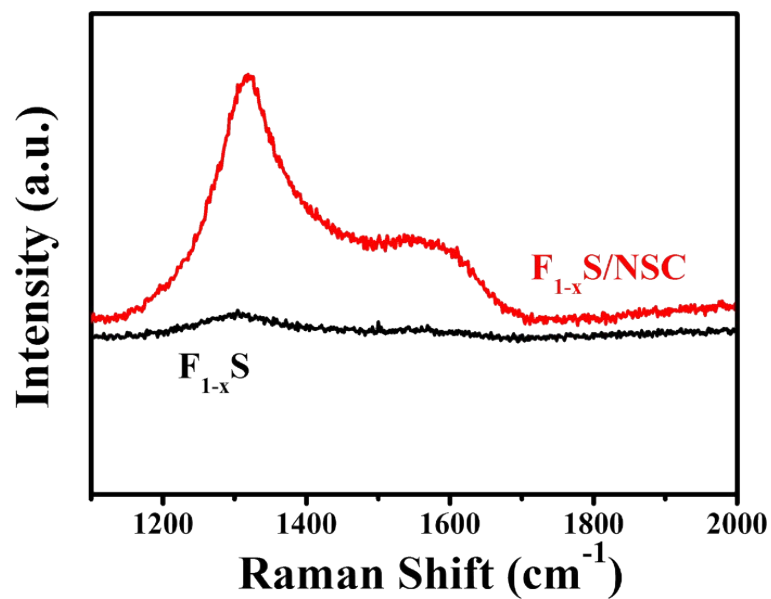

**Fig. S4** Raman spectra of  $\text{Fe}_{1-x}\text{S}/\text{NSC}$  and  $\text{Fe}_{1-x}\text{S}$ .

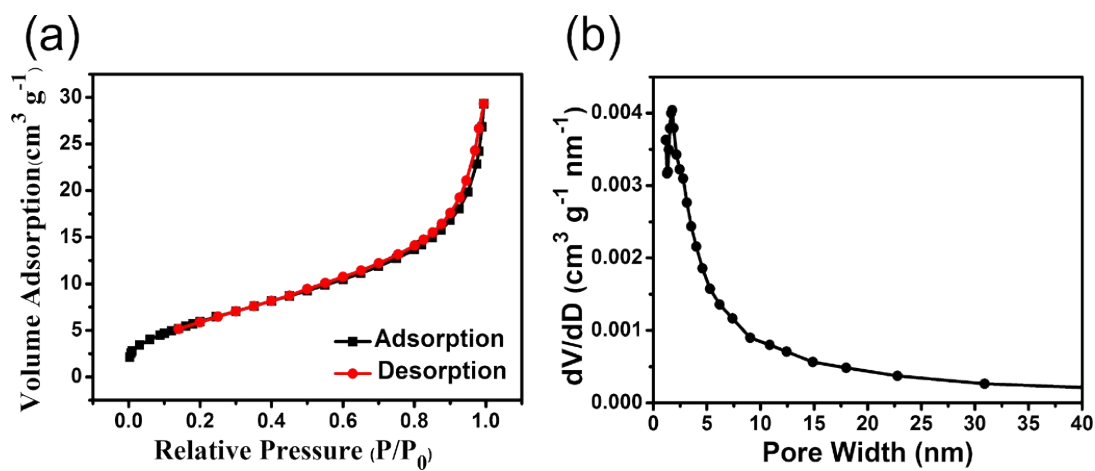

**Fig. S5**  $\text{N}_2$  sorption/desorption isotherms (a) and pore size distribution curve (b) of  $\text{Fe}_{1-x}\text{S}/\text{NSC}$  nanocomposite.

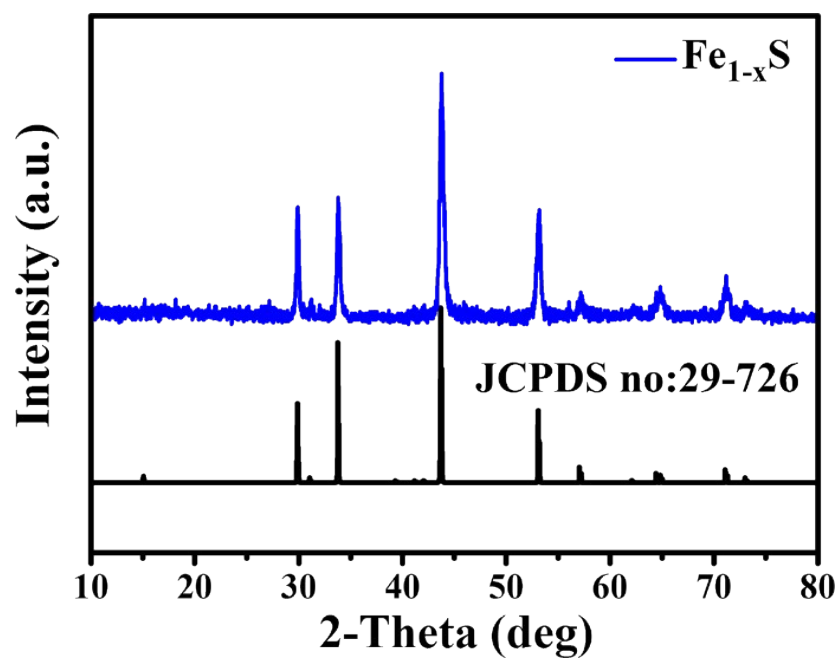

**Fig. S6** The XRD pattern of  $\text{Fe}_{1-x}\text{S}$ .

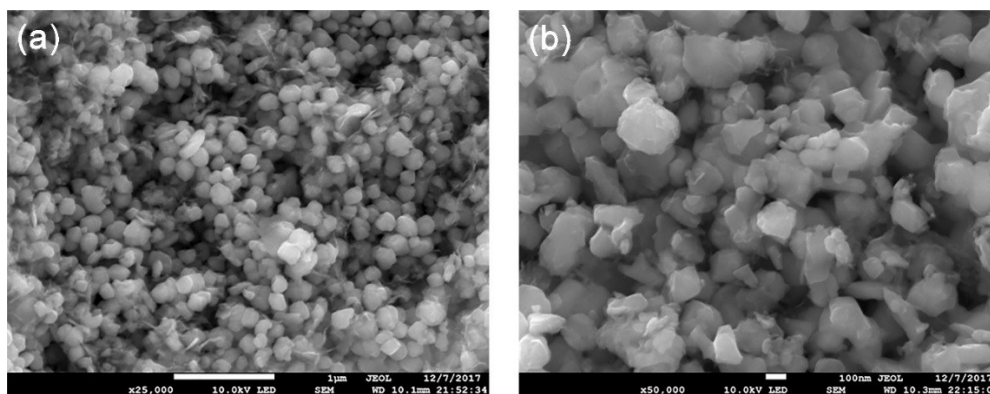

**Fig. S7** The SEM images of  $\text{Fe}_{1-x}\text{S}$ .

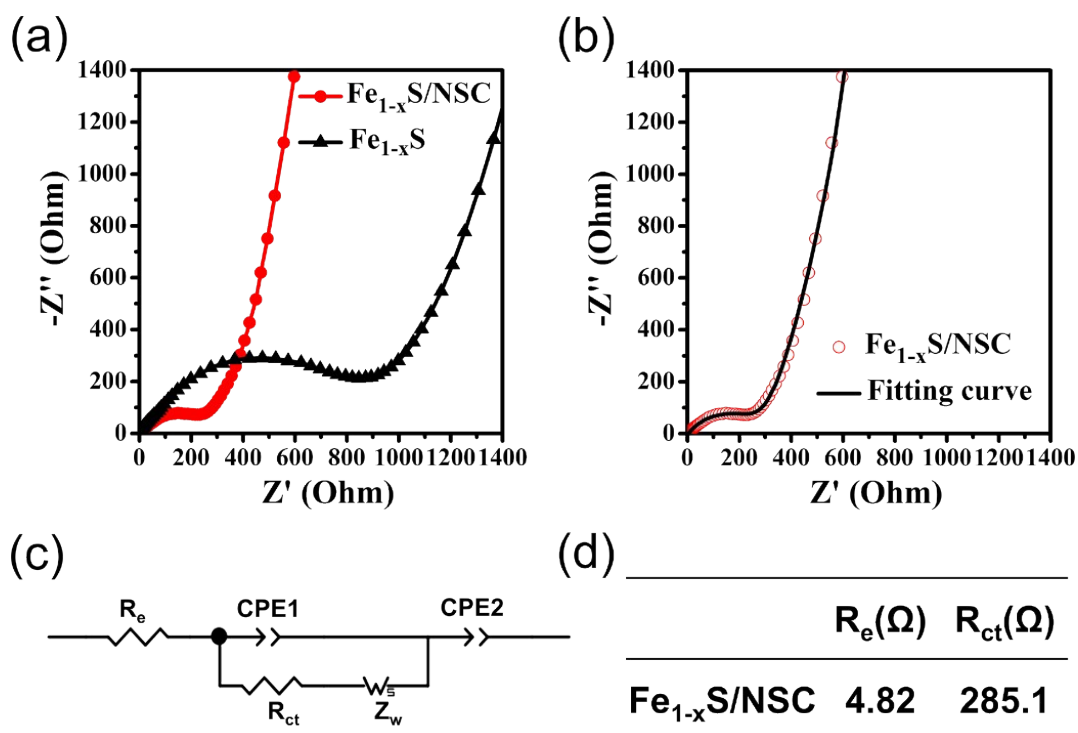

**Fig. S8** (a) Nyquist plots of the  $\text{Fe}_{1-x}\text{S/NSC}$  and  $\text{Fe}_{1-x}\text{S}$  electrodes; (b) Nyquist plots of the  $\text{Fe}_{1-x}\text{S/NSC}$  and corresponding fitting curve; (c) Equivalent circuit model for interpreting Nyquist plots and (d) derived parameters of the  $\text{Fe}_{1-x}\text{S/NSC}$ . ( $R_e$ : electrolyte resistance;  $R_{ct}$ : charge transfer resistance; CPE: constant phase element;  $Z_w$ : Warburg impedance.)

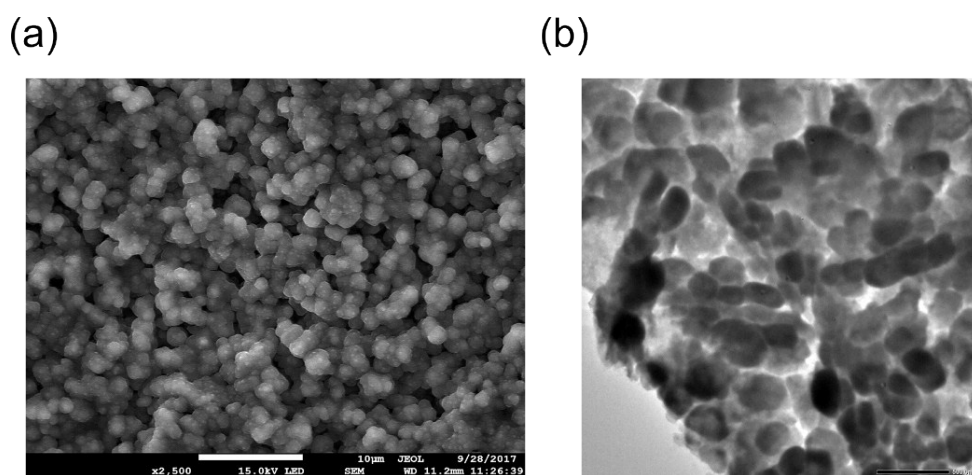

**Fig. S9** (a) SEM images and (b) TEM images of the  $\text{Fe}_{1-x}\text{S/NSC}$  electrode after 100 cycles.

**Table S1.** Comparison of the specific capacity and cycling performance for Fe<sub>1-x</sub>S/NSC composite in this work with the previously reported iron sulfides-based electrodes.

| <b>Materials</b>             | <b>Current<br/>density (A g<sup>-1</sup>)</b> | <b>Specific<br/>Capacity (mAh g<sup>-1</sup>)</b> | <b>Cycle<br/>number</b> | <b>Ref.</b>      |
|------------------------------|-----------------------------------------------|---------------------------------------------------|-------------------------|------------------|
| <b>Fe<sub>1-x</sub>S/NSC</b> | 0.1/1.0                                       | 1135/707                                          | 100/200                 | <b>This work</b> |
| <b>Fe-S-CM</b>               | 0.05                                          | 736                                               | 50                      | 8                |
| <b>FeS@RGO</b>               | 0.1                                           | 978                                               | 40                      | 39               |
| <b>C@FeS</b>                 | 0.1                                           | 623                                               | 100                     | 46               |
| <b>FeS@CNS</b>               | 1.0                                           | 664                                               | 150                     | 47               |
| <b>FeS@C</b>                 | 0.09                                          | 420                                               | 100                     | 48               |
| <b>FeS<sub>2</sub>@C</b>     | 0.1                                           | 570                                               | 100                     | 49               |
| <b>FeS@rGO</b>               | 0.2/1.0                                       | 887/662                                           | 150/200                 | 50               |
